# Supplementary material for: A quantitative approach to determine the taxonomic identity and ontogeny of the pycnodontiform fish Pycnodus (Neopterygii, Actinopterygii) from the Eocene of Bolca Lagerstätte, Italy
Source: PeerJ. 2018 May 18;6:e4809. doi: 10.7717/peerj.4809 (PMC5961631; doi:10.7717/peerj.4809)
Supplement: Supplemental Information 2 [file peerj-06-4809-s002.xlsx]

## Sheet: Tabelle1
Species	Specimen number	Head length	Head depth	Maximum body depth	Pectoral fin base	Dorsal fin base	Anal fin base	Caudal peduncle depth	Caudal peduncle length	Caudal fin span	Prepectoral distance	Predorsal distance	Prepelvic distance	Preanal distance	Preorbital length	Postorbital length	Orbit diameter	Lower jaw length	SL (cm)	TL (cm)
Pycnodus sp.	12058	2.26	4.13	4.82	0.58	3.97	3.01	0.34	1.25	2.67	?	3.44	4.08	4.48	0.94	0.34	0.98	1.46	8.17	7.18
Pycnodus sp.	12059	1.67	3.09	3.41	0.29	2.3	1.21	0.28	0.82	1.99	1.64	2.25	2.92	3.33	0.63	0.45	0.53	0.86	5.43	6.59
Pycnodus sp.	12808	7.05	10.03	?	?	8.66	5.84	0.76	2.53	7.29	6.01	9.1	10.63	11.78	2.98	1.36	1.59	2.31	20.08	7.98
Pycnodus sp.	12809	2.21	3.9	4.32	0.66	2.98	1.88	0.29	0.99	2.35	2.07	2.97	3.77	4.22	0.87	0.43	0.86	1.12	7.01	8.33
Pycnodus sp.	26968	5.54	9.72	?	1.23	10.56	7.06	0.71	3.36	7.08	5.29	8.97	?	12.1	2.89	1.08	1.5	2.98	22	?
Pycnodus sp.	26969	7.04	11.51	?	?	11.26	9.07	0.94	3.18	8.3	?	10.69	12.19	13.62	3.74	0.87	?	4.64	25.52	6.99
Pycnodus platessus	1853.XXVII.i.a/b	1.78	3.5	3.87	0.42	2.5	1.42	0.28	0.89	2.17	1.8	2.45	3.25	3.65	0.48	0.58	0.86	1.13	5.93	10.59
Pycnodus platessus	1855.VI.75	1.86	3.64	3.94	0.55	2.31	1.48	0.39	1.02	2.3	2.05	2.92	3.24	3.79	0.77	0.56	0.75	0.9	6.05	9.42
Pycnodus platessus	6880Z	6.7	11.57	13.42	1.74	12.47	9.64	1.22	3.69	10.72	7.15	11.02	12.36	14.22	3.27	1.4	1.86	4.6	27.71	5.17
Pycnodus gibbus	7433C	1.6	3.21	3.63	0.41	2.49	1.49	0.27	0.96	1.94	1.67	2.26	2.97	3.31	0.39	0.46	0.66	1.14	5.57	9.24
Pycnodus platessus	8867C	3.06	4.49	5.19	0.4	3.14	2.17	0.32	1.59	3.38	2.9	4.35	4.42	5.23	1.27	0.67	0.96	1.52	8.82	22.35
Pycnodus platessus	8868C	3.49	7.53	?	1.27	6.29	3.72	0.72	1.8	?	3.35	4.82	6.35	7.06	1.09	0.68	1.67	?	13.21	22.15
Pycnodus platessus	A.III.a.S.48	1.05	2.41	2.58	0.2	?	?	0.16	0.56	1.08	1.16	1.63	1.89	2.17	0.33	0.31	0.44	0.54	3.38	22.55
Pycnodus platessus	BMNH 38000	2.77	4.06	4.44	0.65	3.29	2.41	0.31	1.18	2.6	2.42	3.84	4.1	4.86	0.98	0.68	0.79	1.01	8.34	26.47
Pycnodus gibbus	BMNH P.11992	1.78	3.12	3.32	0.46	1.63	1.29	0.29	0.88	?	?	2.64	2.63	3.15	0.67	0.47	0.71	?	5.1	6.49
Pycnodus gibbus	BMNH P.1632/P.3760	5.51	7.64	9.28	?	6.18	5.34	0.54	2.43	6.94	?	8.76	7.49	9.32	2.89	1.22	1.62	3.08	17.4	5.92
Pycnodus platessus	BMNH P.1633	1.7	3.34	3.78	0.54	2.21	1.49	0.22	0.99	2.06	1.67	2.54	2.95	3.36	0.56	0.36	0.75	0.87	5.79	10.44
Pycnodus gibbus	BMNH P.17025	5.92	9.77	?	1.66	12.13	8.72	0.79	3.23	8.62	6.12	9.24	10.62	12.34	2.97	1.16	1.76	3.1	23.99	6.86
Pycnodus gibbus	BMNH P.4386	2.96	4.81	5.51	0.42	3.74	2.52	0.39	1.37	3.04	2.65	4.17	4.58	5.46	1.04	0.78	0.98	1.24	9.28	10.37
Pycnodus gibbus	BMNH P.44519	2.26	3.81	4.39	0.51	2.97	1.98	0.36	1	2.6	2.05	3.23	3.67	4.19	1.09	0.58	0.8	0.91	7.27	11.56
Pycnodus gibbus	BMNH P.44520	1.94	3.31	3.55	0.44	2.1	1.38	0.22	0.77	1.95	1.9	2.78	2.54	3.39	0.82	0.4	0.68	0.68	5.62	10.63
Pycnodus platessus	BMNH P.7459	1.77	3.28	3.44	0.5	2.15	1.4	0.21	0.73	2.07	1.67	2.35	2.81	3.18	0.49	0.66	0.74	0.7	5.09	15.45
Pycnodus apodus	Bol 126/127	4.65	9.3	10.07	1.42	7.76	4.9	0.58	2.7	?	5	8.3	9.17	10.92	1.82	1.46	1.24	2.51	18.48	10.5
Pycnodus apodus	Bol 130/131	1.95	3.26	3.6	0.65	1.95	1.57	0.35	0.88	1.82	?	2.53	2.86	3.1	0.65	0.56	0.67	0.86	5.48	3.57
Pycnodus apodus	Bol 134/135	1.96	3.39	3.84	0.48	2.11	1.55	0.23	0.94	2.31	1.84	2.89	3.06	3.57	0.65	0.45	0.74	0.74	5.95	9.4
Pycnodus apodus	Bol 94/95	2.7	4.29	4.98	0.63	3.28	2.59	0.33	1.28	2.95	2.5	4.25	4.02	4.9	1.02	0.47	1.1	1.43	8.77	24.89
Pycnodus platessus	BSPG AS I 1208	?	?	7.57	0.65	6.35	3.01	0.57	1.85	?	?	?	?	?	?	0.66	1.26	?	?	13.25
Pycnodus platessus	BSPG AS I 1209	3.43	5.72	6.72	1.03	4.48	2.94	0.42	1.69	4.45	3.24	5.38	5.63	6.78	1.59	0.67	1.26	1.32	11.56	30.61
Pycnodus platessus	CM 4479	2.97	4.27	5.17	0.56	3.89	2.53	0.41	1.37	3.88	2.78	4.49	4.57	5.5	1.1	0.53	1.01	1.1	9.73	25.06
Pycnodus platessus	CM 4479a	3.71	6.29	7.78	0.9	5.42	3.66	0.43	1.66	4.97	3.76	5.81	6.42	7.66	1.59	0.62	0.93	1.51	13	24.94
Pycnodus gibbus	CM 4480	6.91	10.8	12.14	?	11.36	7.95	1.14	3.53	8.89	?	10.66	12.24	14.13	4.1	1.66	1.39	3.2	24.79	9.92
Pycnodus gibbus	CM 4480.1	4.64	8.61	10.22	1.44	9.83	5.88	0.75	2.96	7.77	4.98	6.94	9.1	10.88	1.92	0.73	2.16	2.82	19.34	9.78
Pycnodus gibbus	CM 4481	?	2.07	2.26	0.26	1.06	0.87	0.18	0.61	?	?	?	?	?	?	0.32	0.41	?	3.07	13.25
Pycnodus sp.	Coll Baja Pesciara 4 (T.998)	5.81	9.94	11.19	1.1	8.02	6	0.82	2.65	7.63	5.96	9.47	9.69	11.44	3.37	0.93	1.82	3.31	20.02	6.39
Pycnodus sp.	Coll Baja Pesciara 5 (T.999)	2.63	4.18	5	0.87	3.07	2	0.4	1.2	3.13	2.45	3.87	4.09	4.93	1.2	0.48	0.96	?	8.02	6.59
Pycnodus sp.	I.G.135608	3.36	5.73	6.73	0.76	5.48	3.3	0.48	1.43	4.06	3.41	4.82	5.88	6.86	1.25	0.81	1.25	1.28	11.71	?
Pycnodus sp.	I.G.135609	5.88	9.74	11.39	1.78	9.15	6.17	1.04	3.08	8.58	6.08	9.52	10.03	12.81	2.77	1.43	1.63	3.21	21.61	?
Pycnodus sp.	I.G.135664	2.76	4.92	5.83	1.52	2.76	?	0.44	1.24	3.78	2.76	3.91	4.93	5.43	1.3	0.75	1.18	?	8.99	?
Pycnodus sp.	II D 167	2.99	5.88	7.29	1	4.44	2.56	?	?	?	2.89	4.33	5.61	6.79	1.24	0.61	1.28	1.66	?
Pycnodus sp.	II D 168	2.86	5.59	6.39	1.48	4.95	2.59	0.49	1.49	?	2.93	4.33	5.46	6.43	0.85	0.5	1.28	1.51	10.68	?
Pycnodus sp.	II D 170	2.72	4.25	4.88	0.98	3.9	2.02	0.38	1.25	3.77	2.78	3.83	4.44	5.56	0.84	0.73	0.9	1.01	9.06	28.65
Pycnodus sp.	II D 171	2.56	4.42	5.04	0.54	3.7	2.35	0.33	1.2	2.88	2.47	3.77	4.19	5.08	0.76	0.62	1.01	1.06	8.47	28.96
Pycnodus sp.	II D 180	2.94	4.72	?	1.04	3.87	2.71	0.36	?	?	2.87	4.52	4.66	5.52	1.32	0.73	0.99	1.45	9.5	?
Pycnodus gibbus	PF 3234	3.81	5.99	7.39	0.83	3.68	3.23	0.54	1.42	3.52	3.76	6.13	5.48	6.57	2.12	0.75	1.04	1.83	11.14	7.68
Pycnodus sp.	sp 1 (I.G.23???)	2.06	3.65	4.04	0.49	2.33	1.69	0.32	1	2.28	1.89	3.01	3.24	3.72	0.84	0.61	0.81	1.21	6.21	19.72
Pycnodus sp.	sp 2 (I.G.186666)	?	?	?	?	?	?	?	?	?	?	?	?	?	?	?	?	?	?	7.65
Pycnodus sp.	sp 3 (I.G.186667)	2.09	3.76	4.28	0.63	2.77	?	0.42	0.89	2.64	1.97	3.13	3.59	4.22	0.98	0.44	0.79	0.92	6.84	7.43
Pycnodus sp.	sp 4 (I.G.24497)	2.36	3.54	3.9	?	1.88	1.6	0.36	1.03	1.75	?	3.36	3.23	3.73	1.08	0.51	0.78	1.08	6.33	6.23
Pycnodus sp.	sp 5	5.6	8.37	?	?	?	?	?	?	?	4.83	7.77	?	?	1.95	1.17	1.95	2.28	?	?
Pycnodus sp.	sp 6 (I.G.135680)	1.13	1.96	2.13	?	?	?	0.27	?	0.94	1.08	?	1.71	?	0.41	0.25	0.49	0.51	2.92	?
Pycnodus sp.	sp 7 (I.G.37581)	4.83	9.83	11.08	1.26	10.85	6.55	0.64	2.42	6.92	5.01	7.79	?	12.12	2.22	0.94	1.62	2.6	21.03	?
Pycnodus sp.	T.309	1.3	2.57	2.75	0.35	1.47	0.68	0.2	0.62	?	1.31	1.86	2.26	2.58	0.33	0.37	0.6	0.56	3.96	4.02
